# Supplementary material
Source: PubMed Central journal article supplement (PMC1311568)

# Figure S1

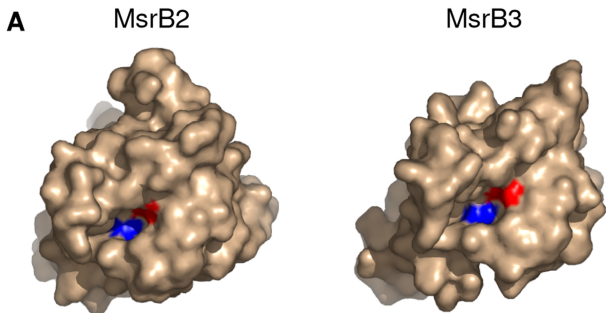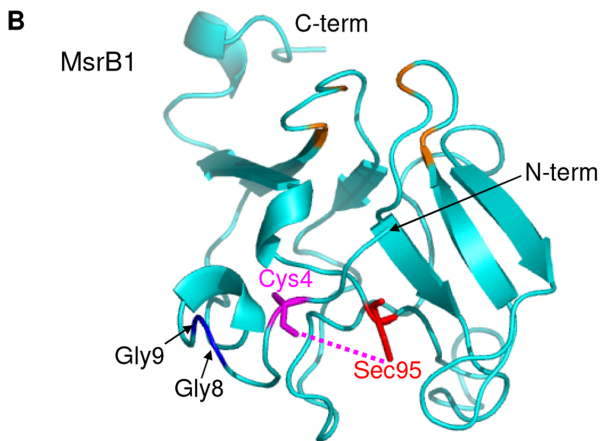

Supplement: pbio.0030375.sg001.pdf [file pbio.0030375.sg001.pdf]
